# Supplementary material
Source: ML conference proceedings conference paper supplement (https://openreview.net/forum?id=xuOQUs5YmT)

# Black-box Adversarial Attack (Wall Time, Test Case 2)

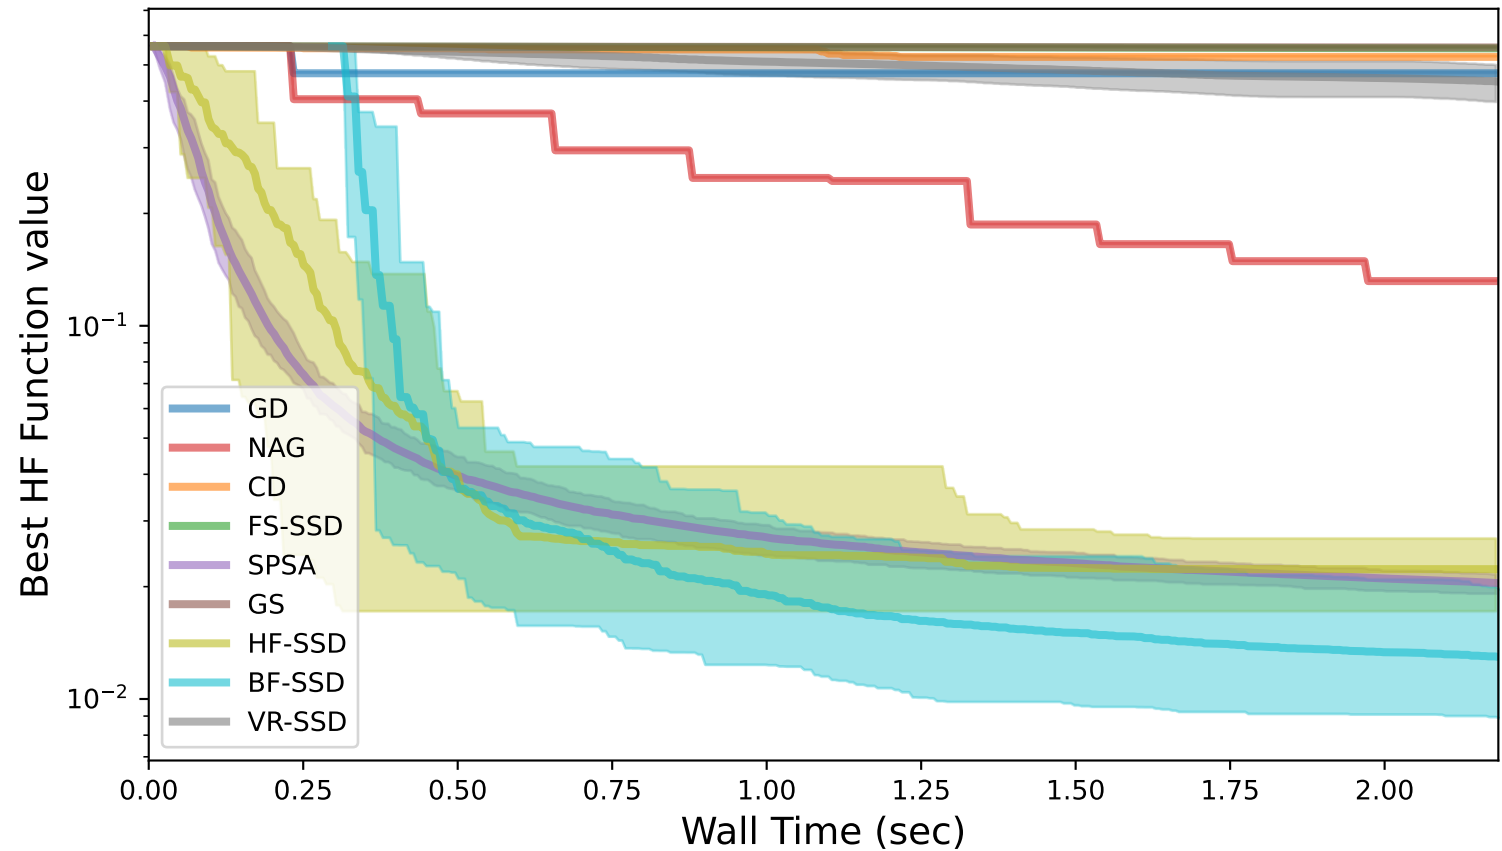

Supplement: supplementary_material [file adversarial-d784-L02.0-tau0.0001-ell20-c0.99-idx18-time.pdf › BF-Stochastic-Subspace-Descent-submission/figs/adversarial/adversarial-d784-L02.0-tau0.0001-ell20-c0.99-idx18-time.pdf]

# Black-box Adversarial Attack (Test Case 2)

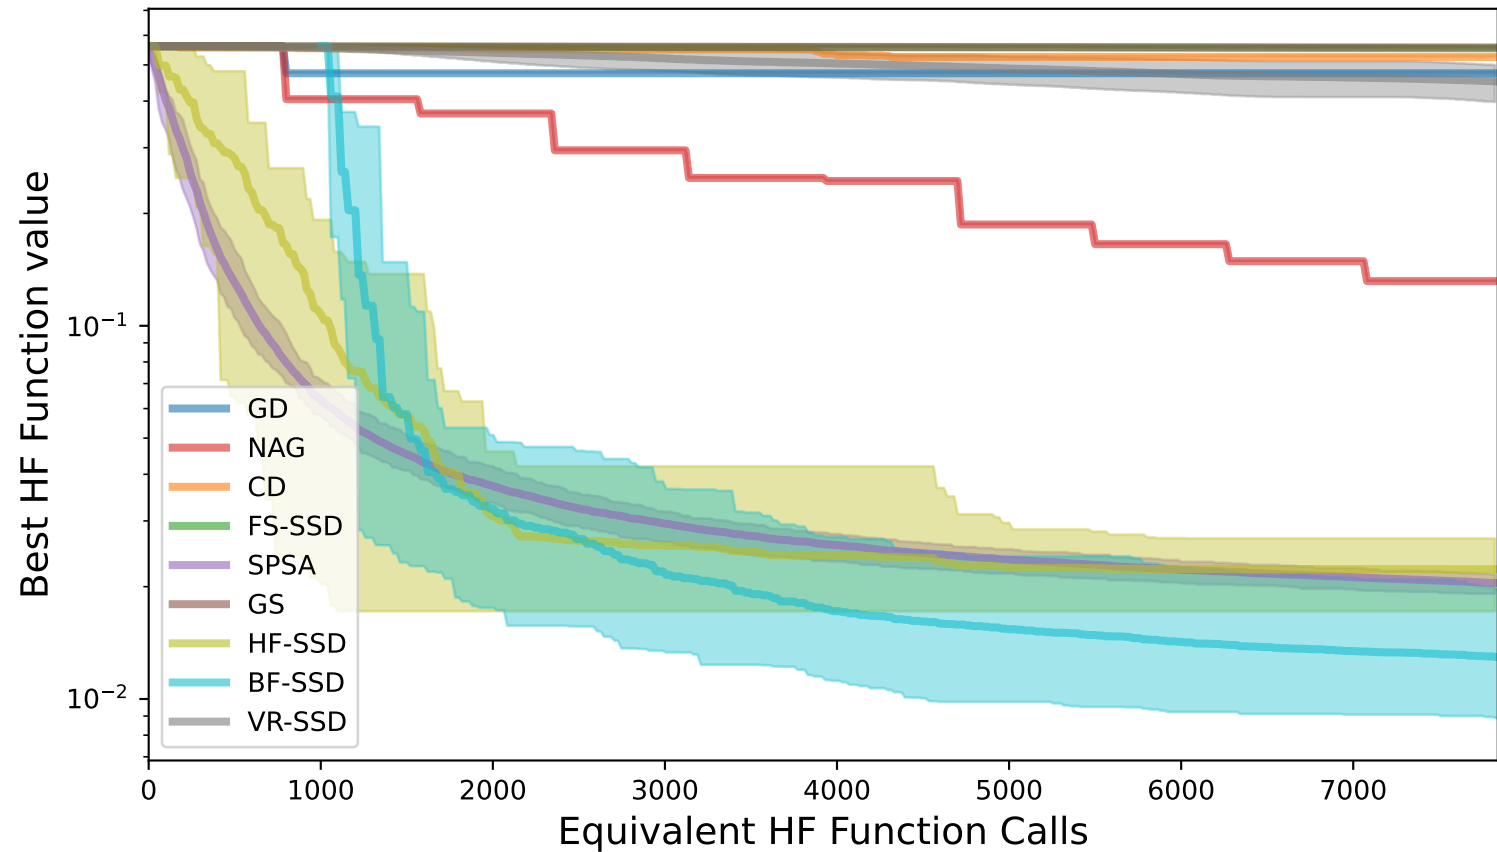

Supplement: supplementary_material [file adversarial-d784-L02.0-tau0.0001-ell20-c0.99-idx18.pdf › BF-Stochastic-Subspace-Descent-submission/figs/adversarial/adversarial-d784-L02.0-tau0.0001-ell20-c0.99-idx18.pdf]

# Black-box Adversarial Attack (Wall Time, Test Case 1)

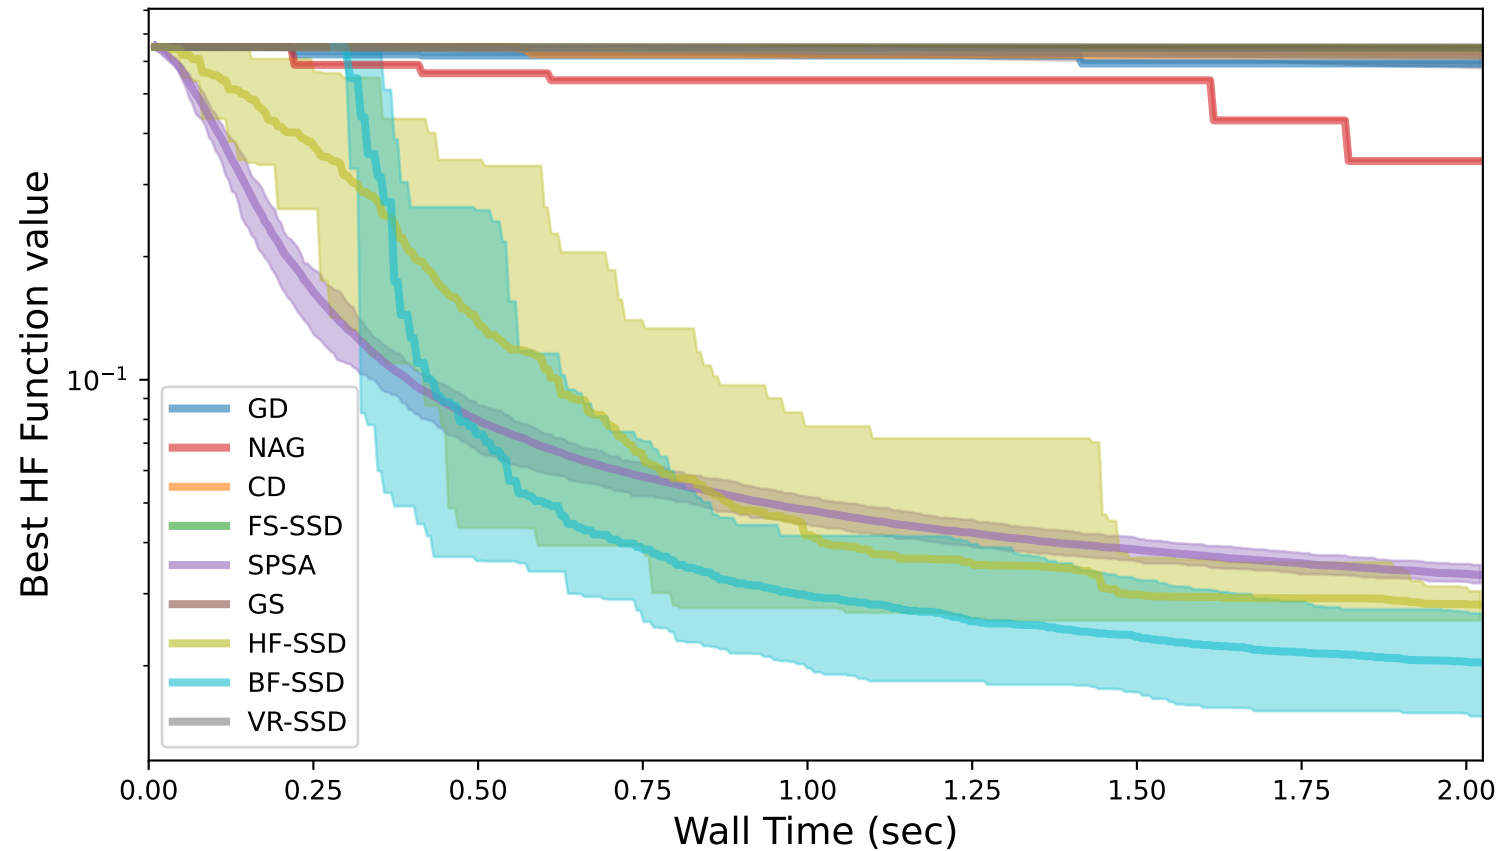

Supplement: supplementary_material [file adversarial-d784-L02.0-tau0.0001-ell20-c0.99-idx8-time.pdf › BF-Stochastic-Subspace-Descent-submission/figs/adversarial/adversarial-d784-L02.0-tau0.0001-ell20-c0.99-idx8-time.pdf]

# Black-box Adversarial Attack (Test Case 1)

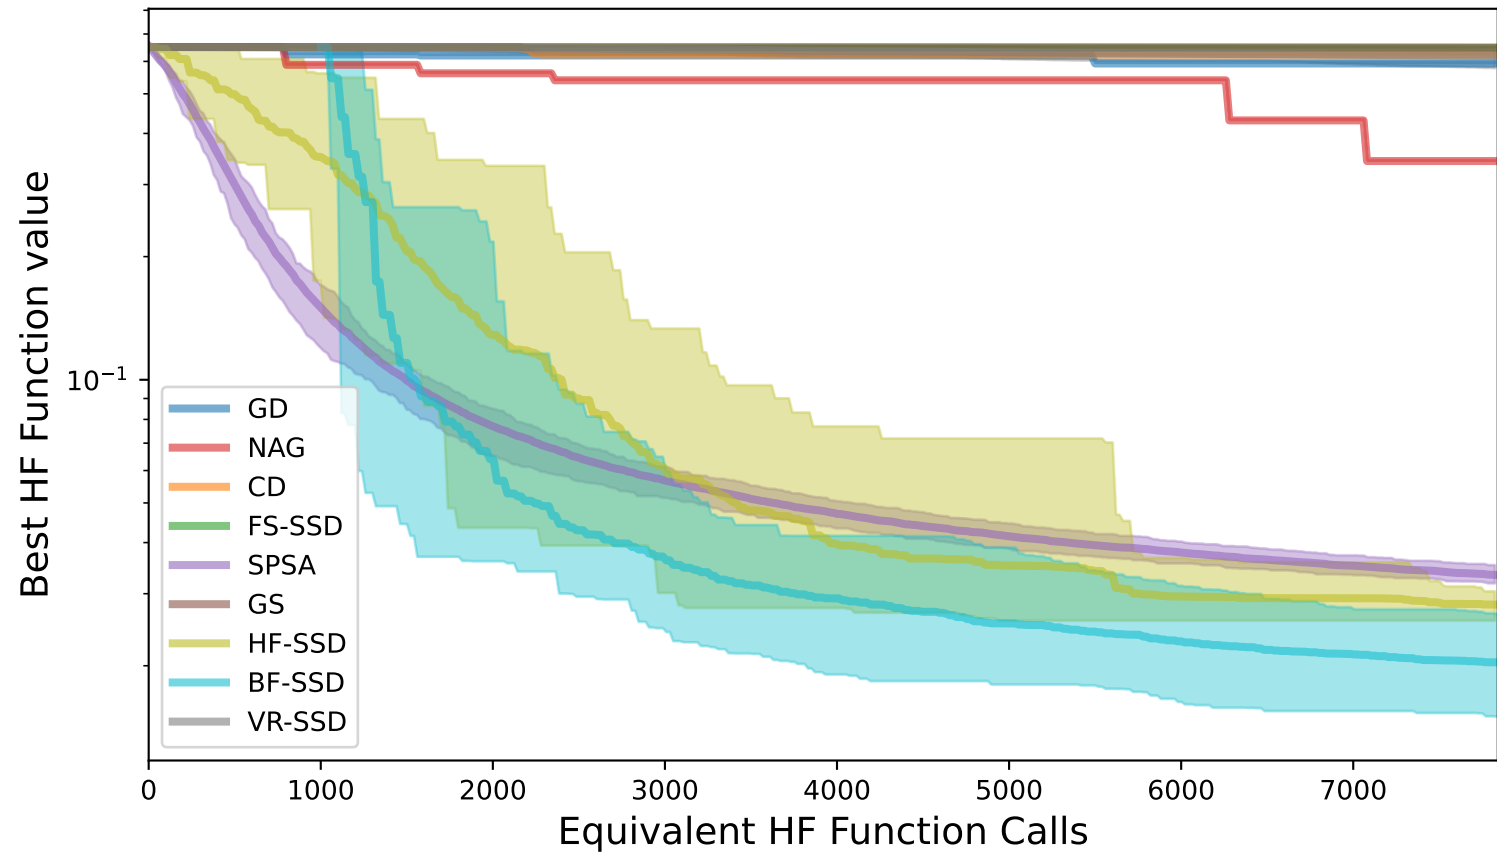

Supplement: supplementary_material [file adversarial-d784-L02.0-tau0.0001-ell20-c0.99-idx8.pdf › BF-Stochastic-Subspace-Descent-submission/figs/adversarial/adversarial-d784-L02.0-tau0.0001-ell20-c0.99-idx8.pdf]

# Black-box Kernel Regression (Wall Time, $c=0.9$ )

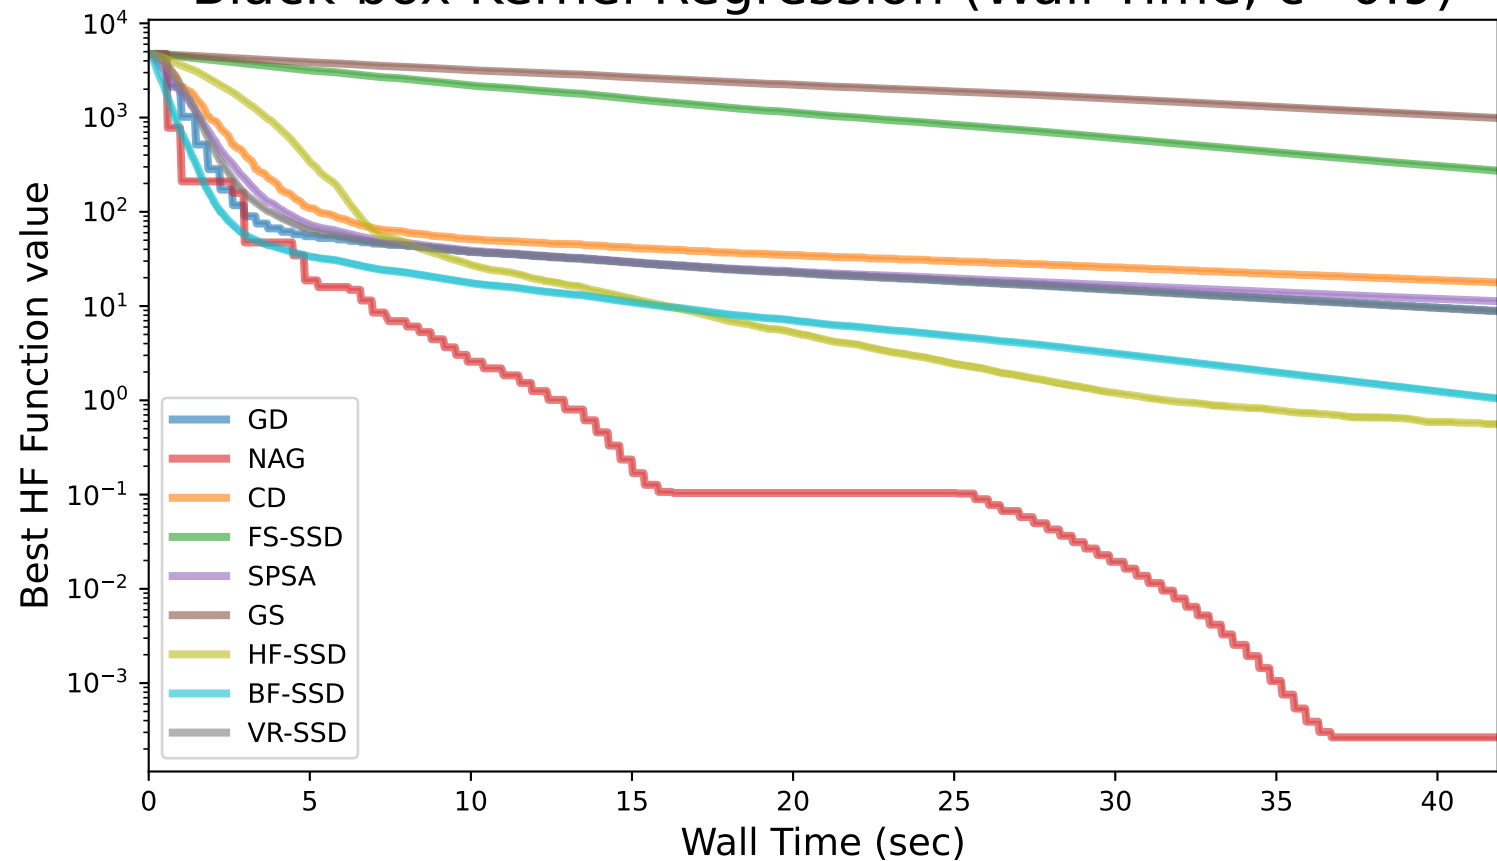

Supplement: supplementary_material [file kernel-d1000-lr10-L01.0-tau0.001-ell50-c0.9-time.pdf › BF-Stochastic-Subspace-Descent-submission/figs/kernel/kernel-d1000-lr10-L01.0-tau0.001-ell50-c0.9-time.pdf]

# Black-box Kernel Regression (c=0.9)

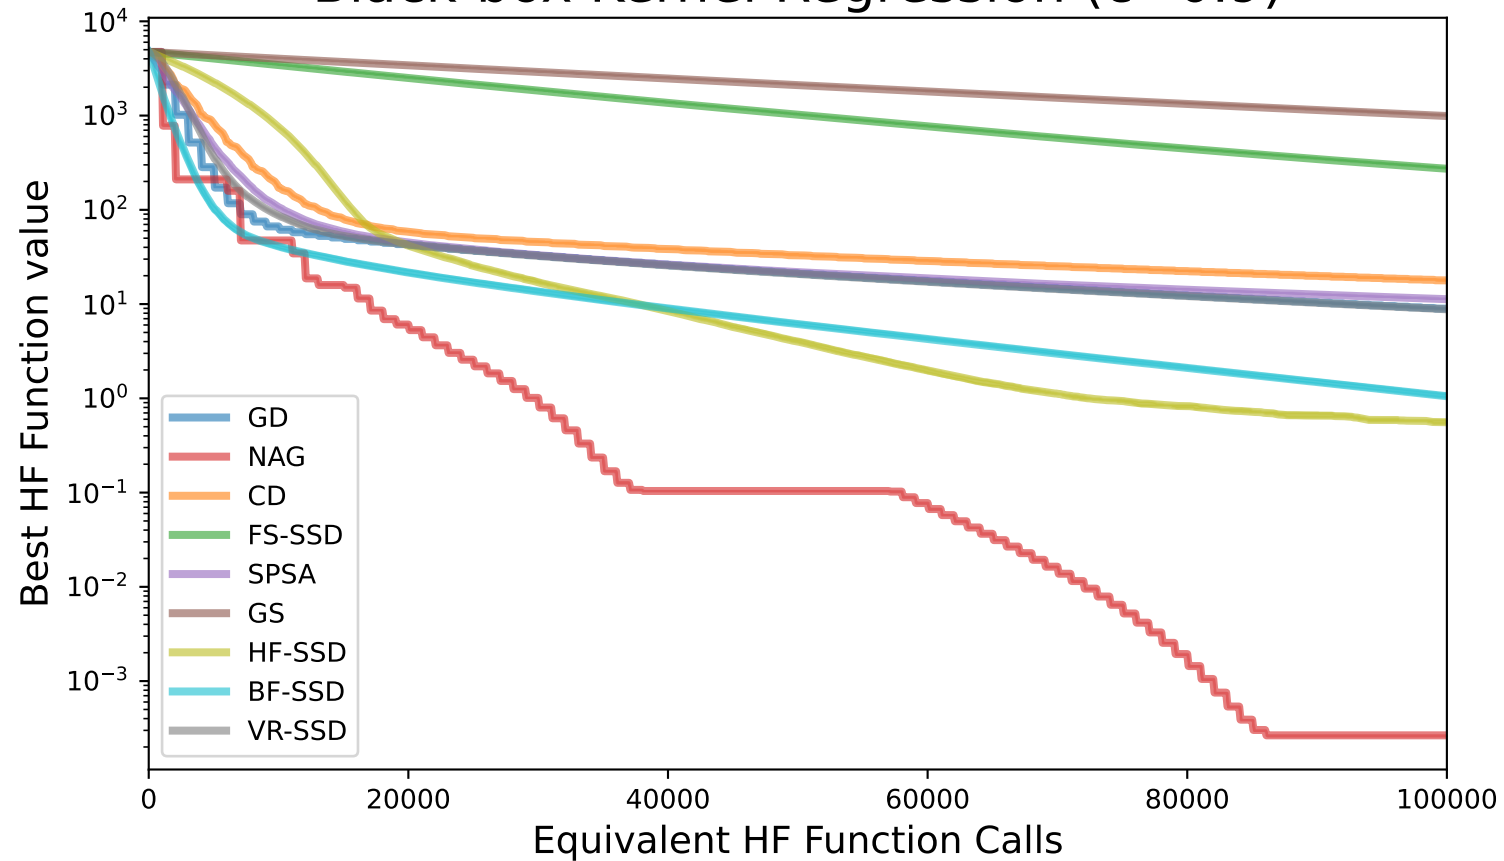

Supplement: supplementary_material [file kernel-d1000-lr10-L01.0-tau0.001-ell50-c0.9.pdf › BF-Stochastic-Subspace-Descent-submission/figs/kernel/kernel-d1000-lr10-L01.0-tau0.001-ell50-c0.9.pdf]

# Black-box Kernel Regression (Wall Time, $c=0.99$ )

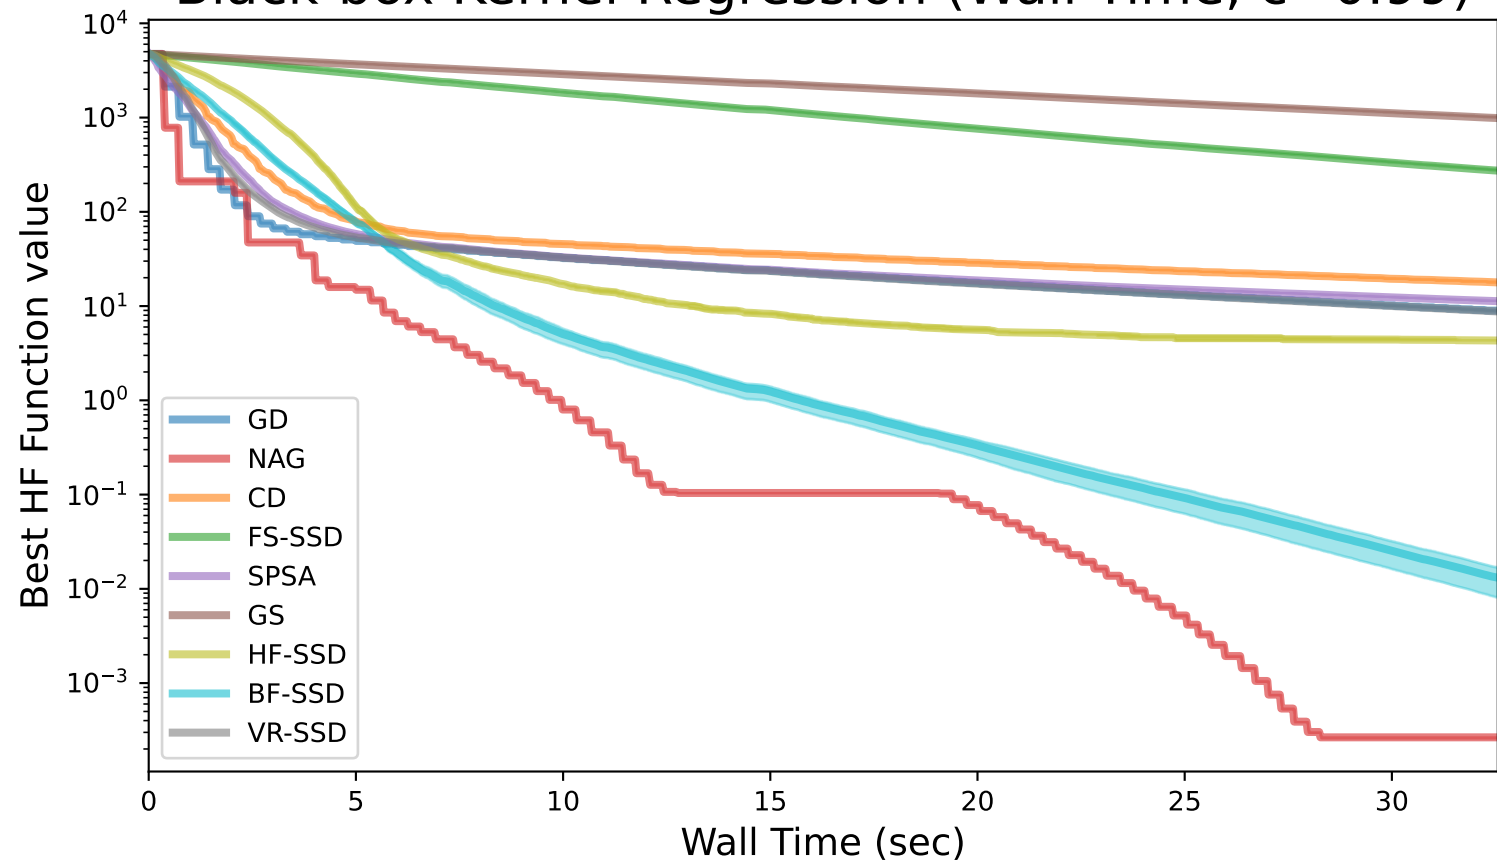

Supplement: supplementary_material [file kernel-d1000-lr10-L01.0-tau0.001-ell50-c0.99-time.pdf › BF-Stochastic-Subspace-Descent-submission/figs/kernel/kernel-d1000-lr10-L01.0-tau0.001-ell50-c0.99-time.pdf]

# Black-box Kernel Regression ( $c=0.99$ )

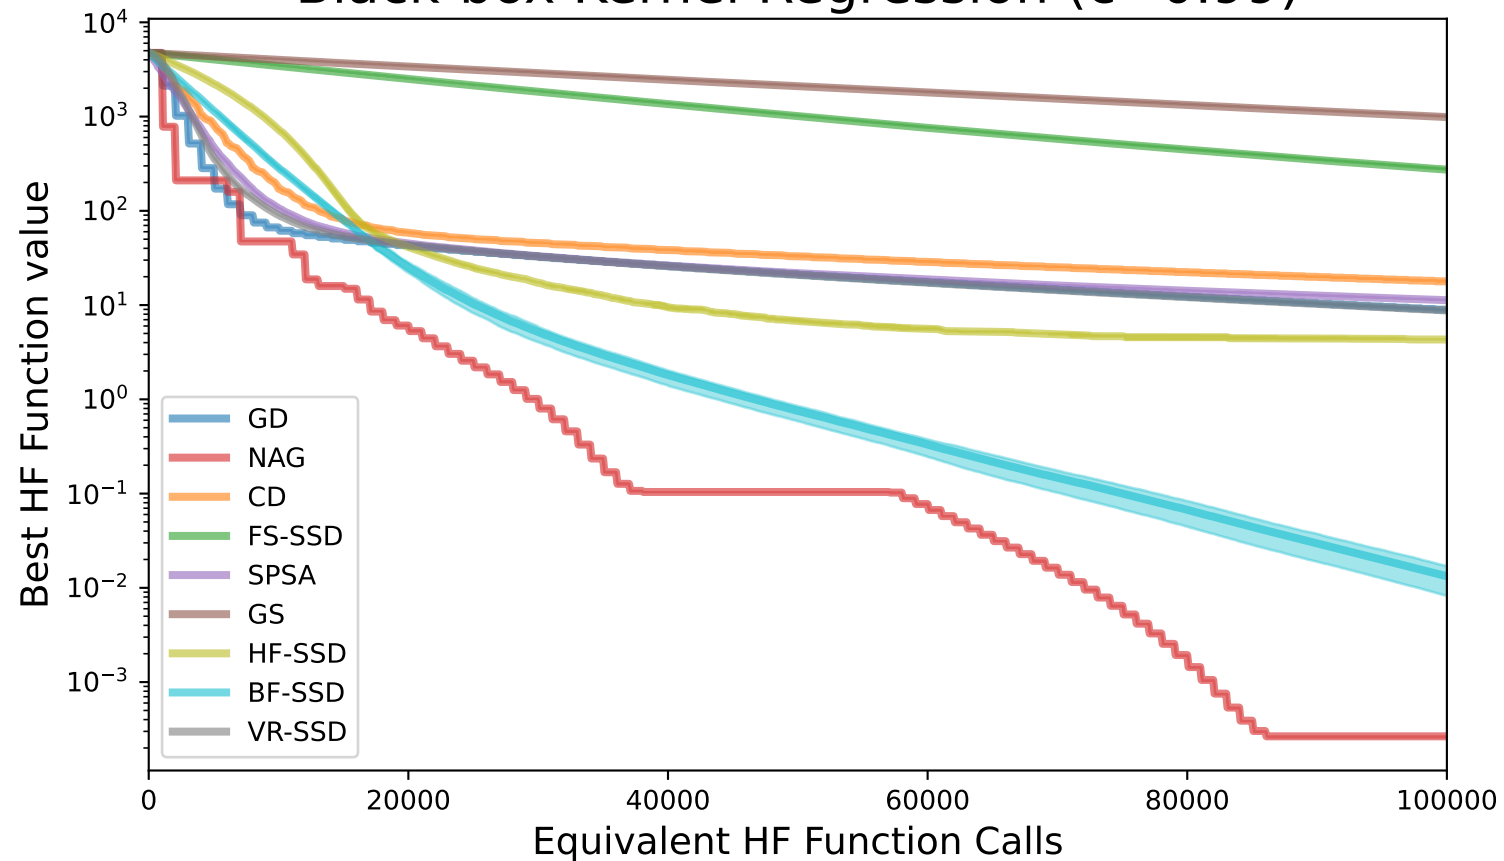

Supplement: supplementary_material [file kernel-d1000-lr10-L01.0-tau0.001-ell50-c0.99.pdf › BF-Stochastic-Subspace-Descent-submission/figs/kernel/kernel-d1000-lr10-L01.0-tau0.001-ell50-c0.99.pdf]

# Soft Prompting DistillBERT on Sentiment Analysis (Wall Time)

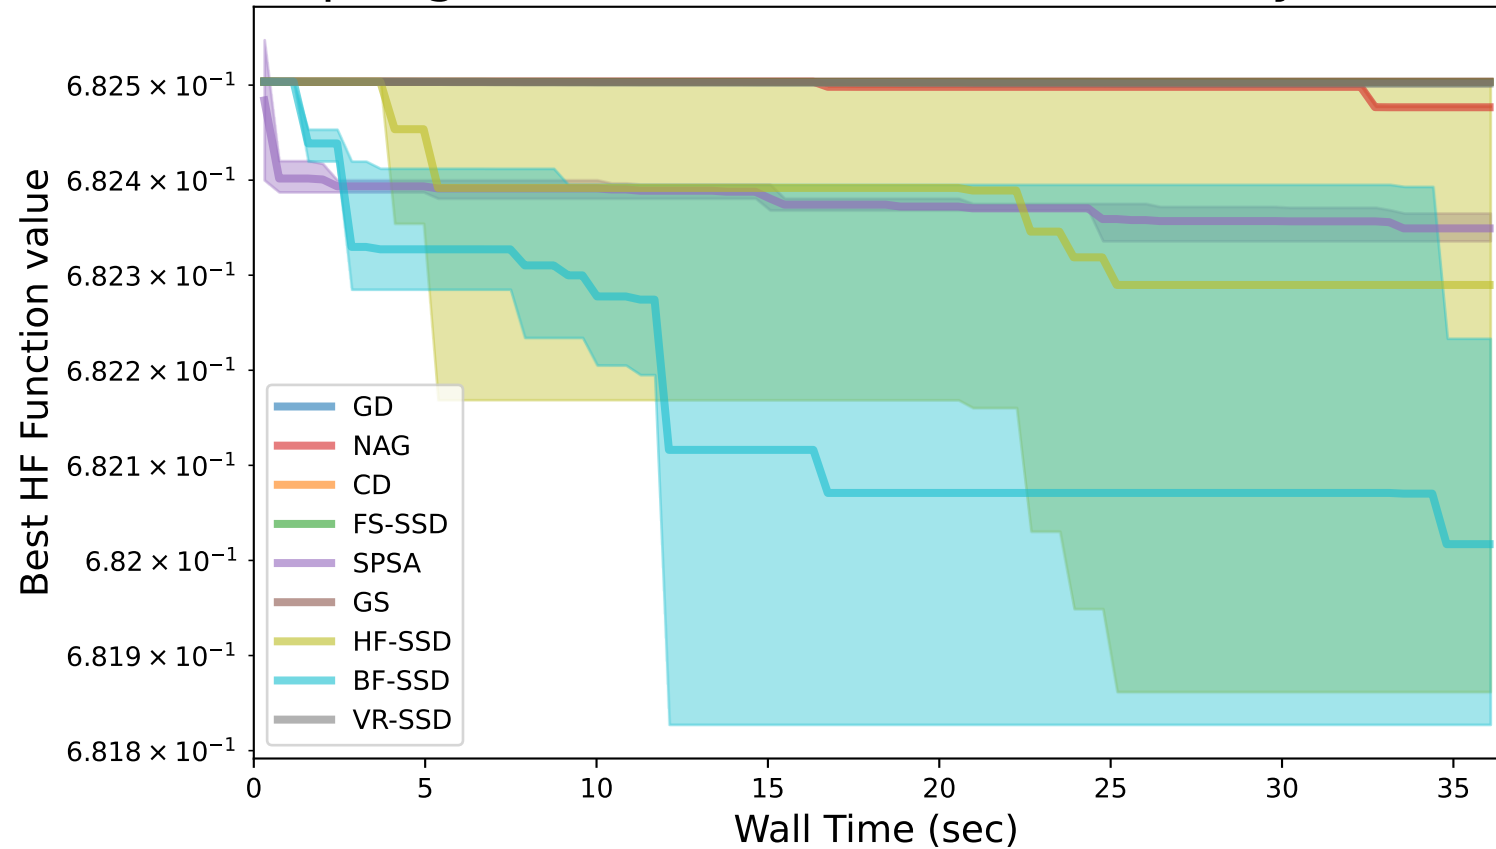

Supplement: supplementary_material [file prompting-d768-L01.0-nH10-nL2-ell50-c0.99-time.pdf › BF-Stochastic-Subspace-Descent-submission/figs/prompting/prompting-d768-L01.0-nH10-nL2-ell50-c0.99-time.pdf]

# Soft Prompting DistillBERT on Sentiment Analysis

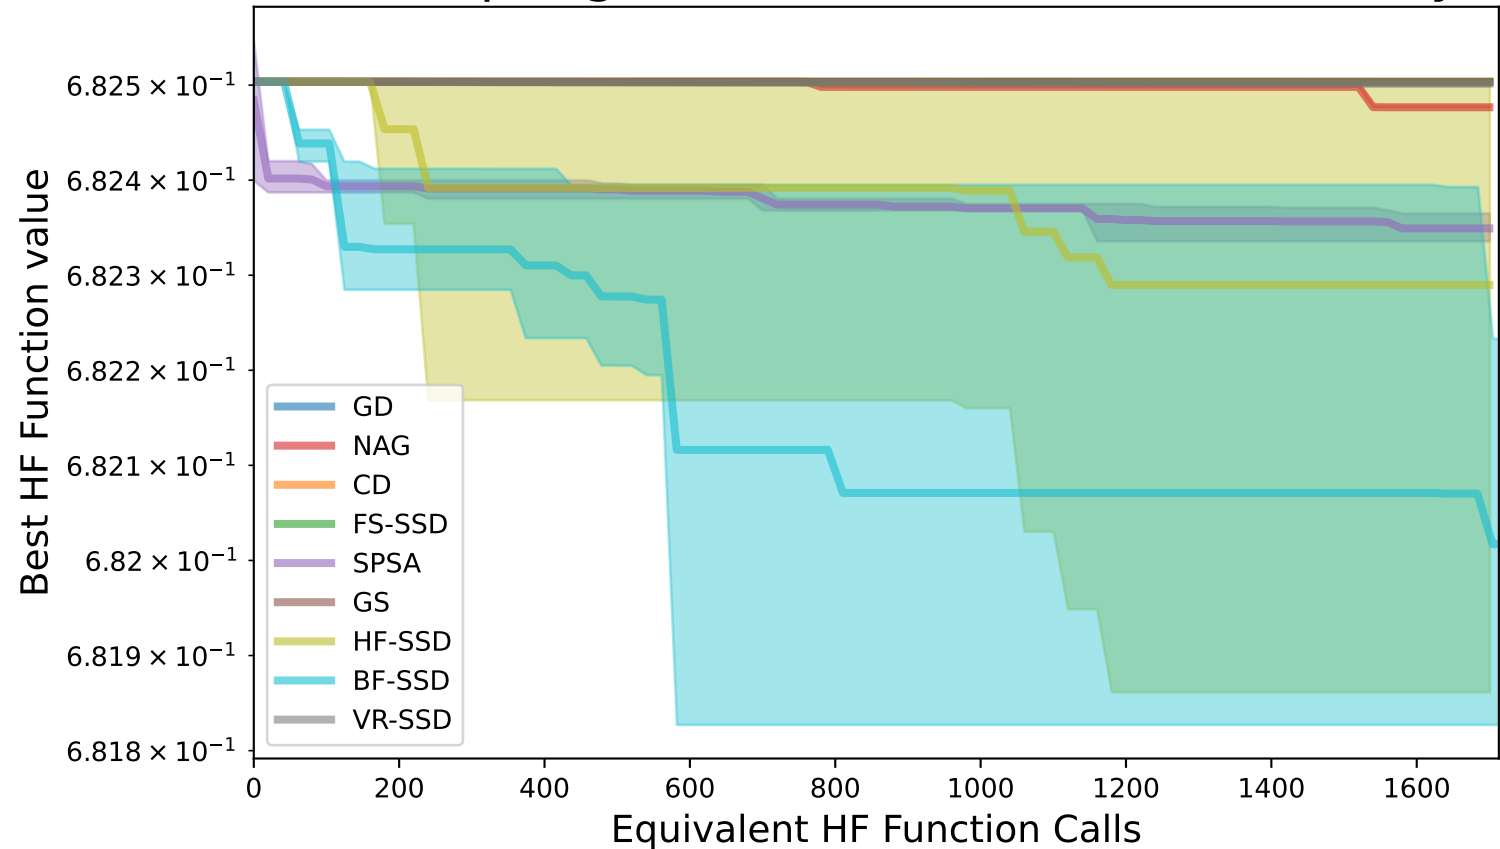

Supplement: supplementary_material [file prompting-d768-L01.0-nH10-nL2-ell50-c0.99.pdf › BF-Stochastic-Subspace-Descent-submission/figs/prompting/prompting-d768-L01.0-nH10-nL2-ell50-c0.99.pdf]

# Worst Function in the World (Wall Time, $\text{ell}=100$ )

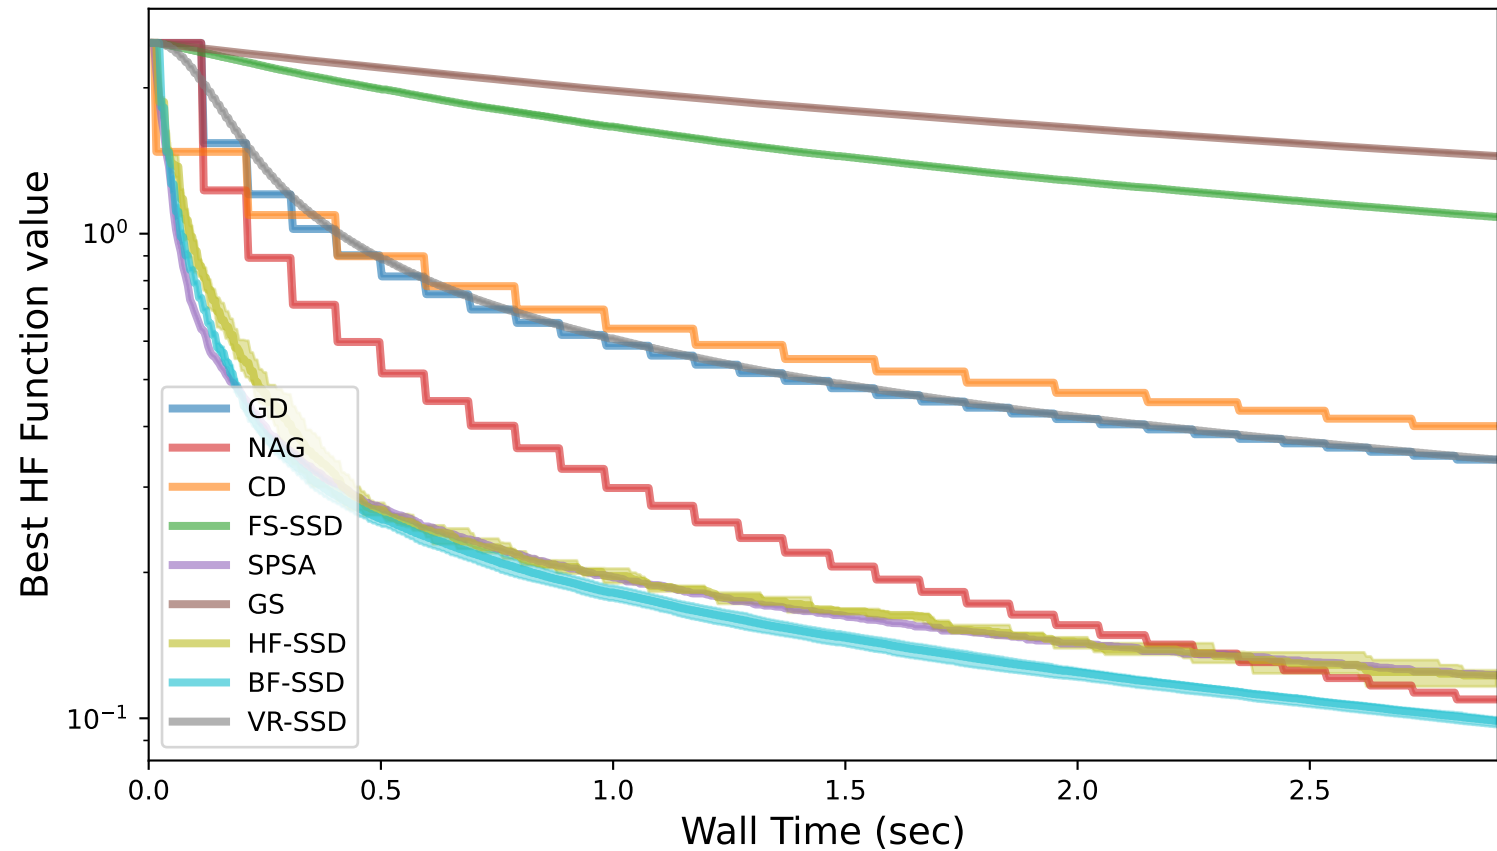

Supplement: supplementary_material [file worst-d1000-rH100-rL2-lmda20.0-ell100-c0.9-time.pdf › BF-Stochastic-Subspace-Descent-submission/figs/worst/worst-d1000-rH100-rL2-lmda20.0-ell100-c0.9-time.pdf]

# Worst Function in the World (ell=100)

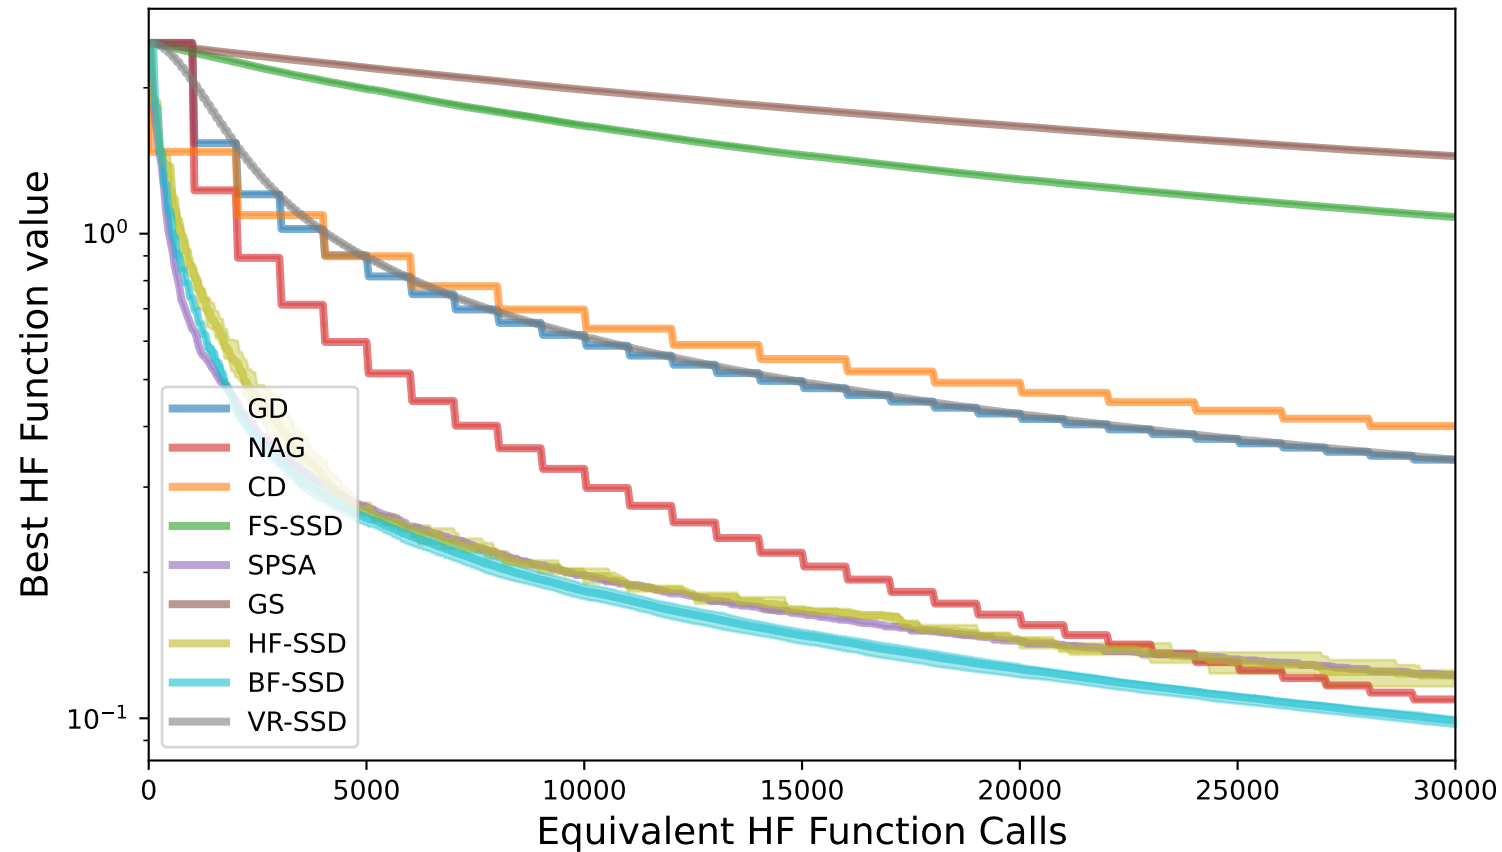

Supplement: supplementary_material [file worst-d1000-rH100-rL2-lmda20.0-ell100-c0.9.pdf › BF-Stochastic-Subspace-Descent-submission/figs/worst/worst-d1000-rH100-rL2-lmda20.0-ell100-c0.9.pdf]

# Worst Function in the World (Wall Time, ell=20)

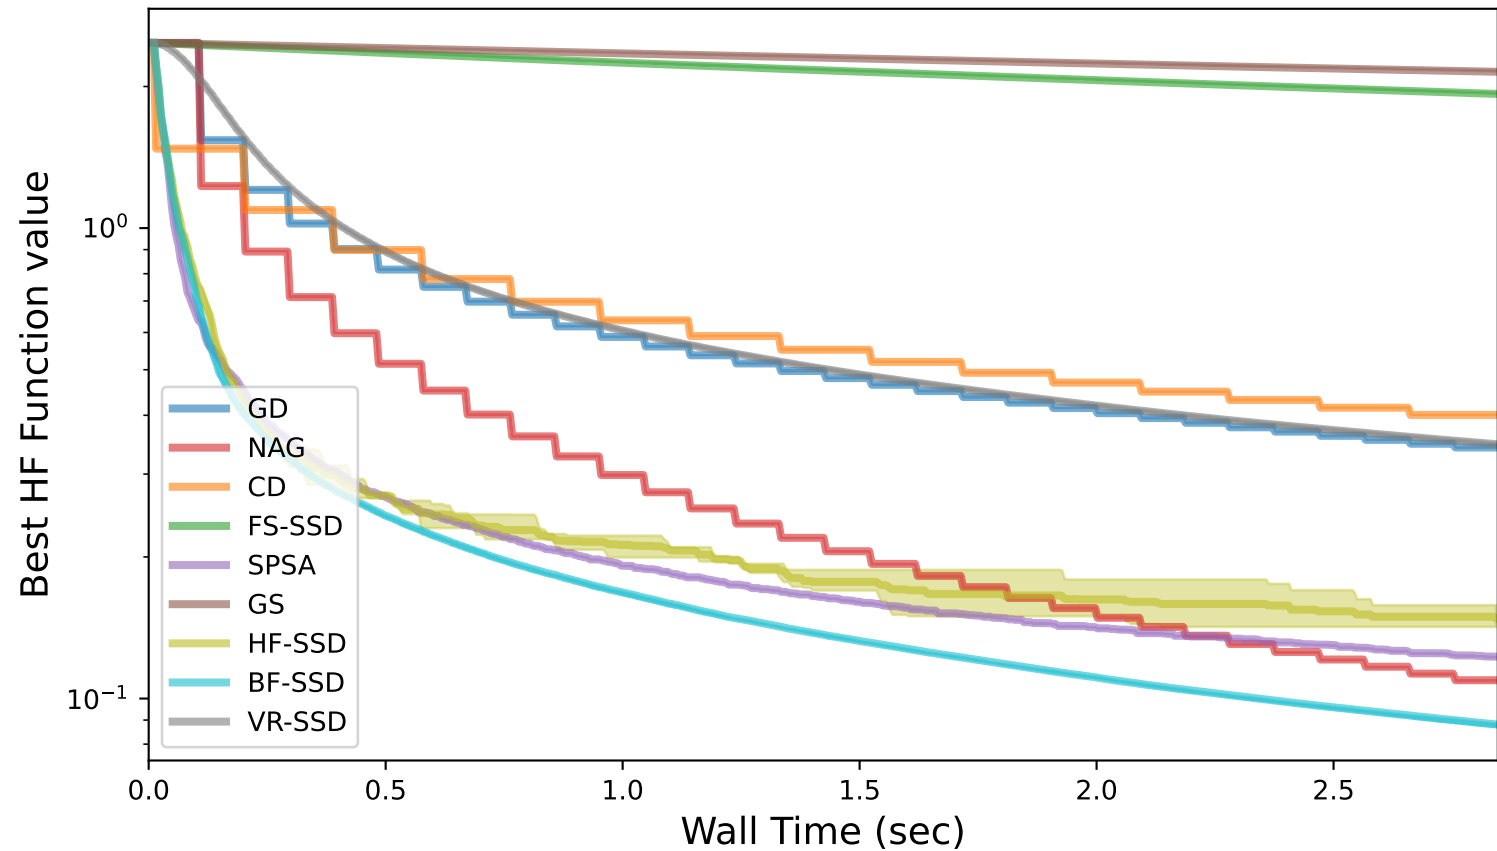

Supplement: supplementary_material [file worst-d1000-rH100-rL2-lmda20.0-ell20-c0.9-time.pdf › BF-Stochastic-Subspace-Descent-submission/figs/worst/worst-d1000-rH100-rL2-lmda20.0-ell20-c0.9-time.pdf]

# Worst Function in the World (ell=20)

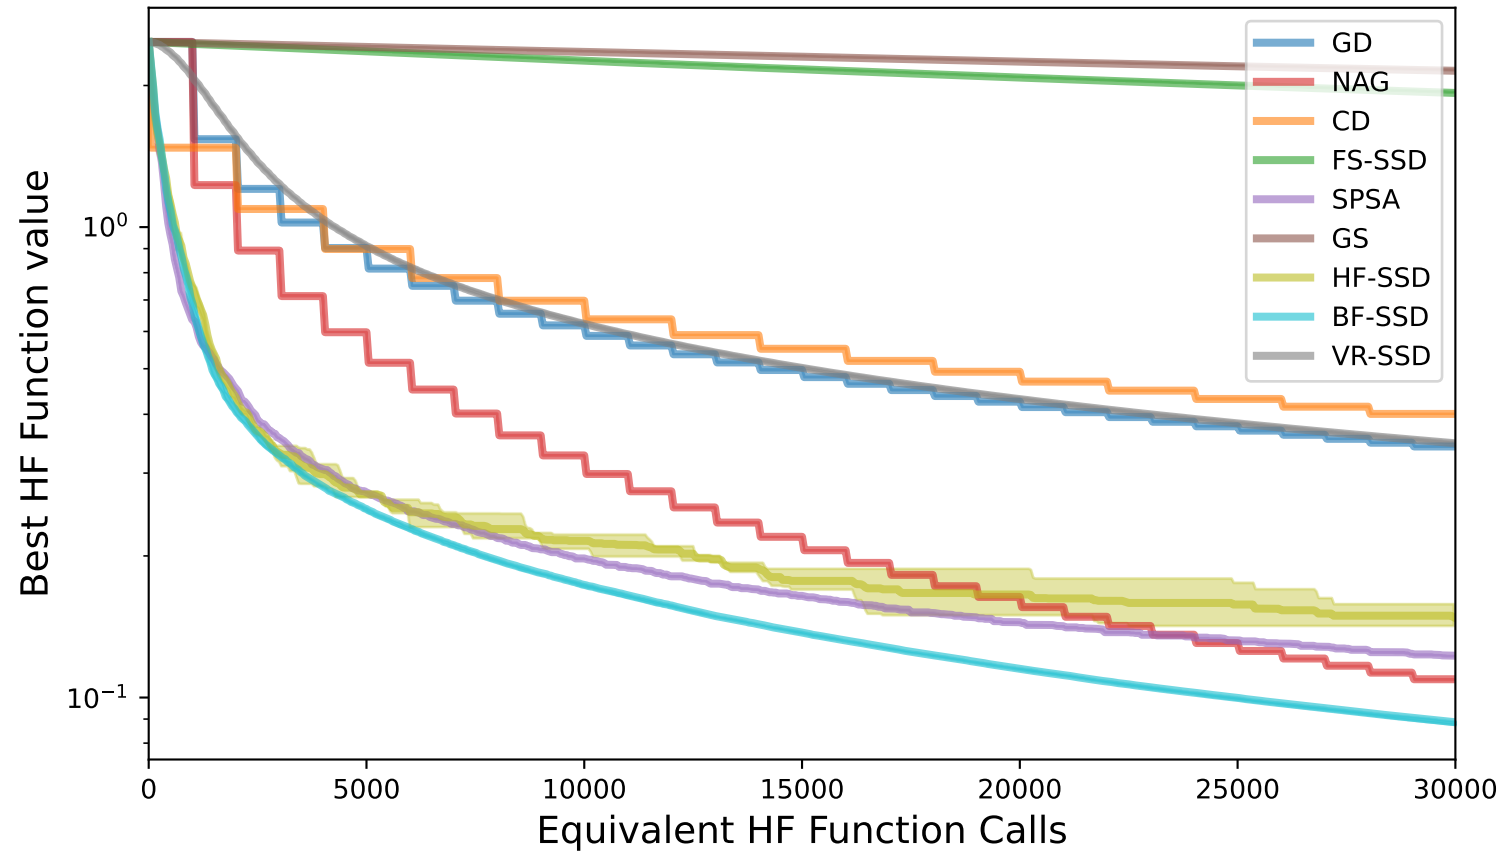

Supplement: supplementary_material [file worst-d1000-rH100-rL2-lmda20.0-ell20-c0.9.pdf › BF-Stochastic-Subspace-Descent-submission/figs/worst/worst-d1000-rH100-rL2-lmda20.0-ell20-c0.9.pdf]

# Worst Function in the World (Wall Time, $\text{ell}=200$ )

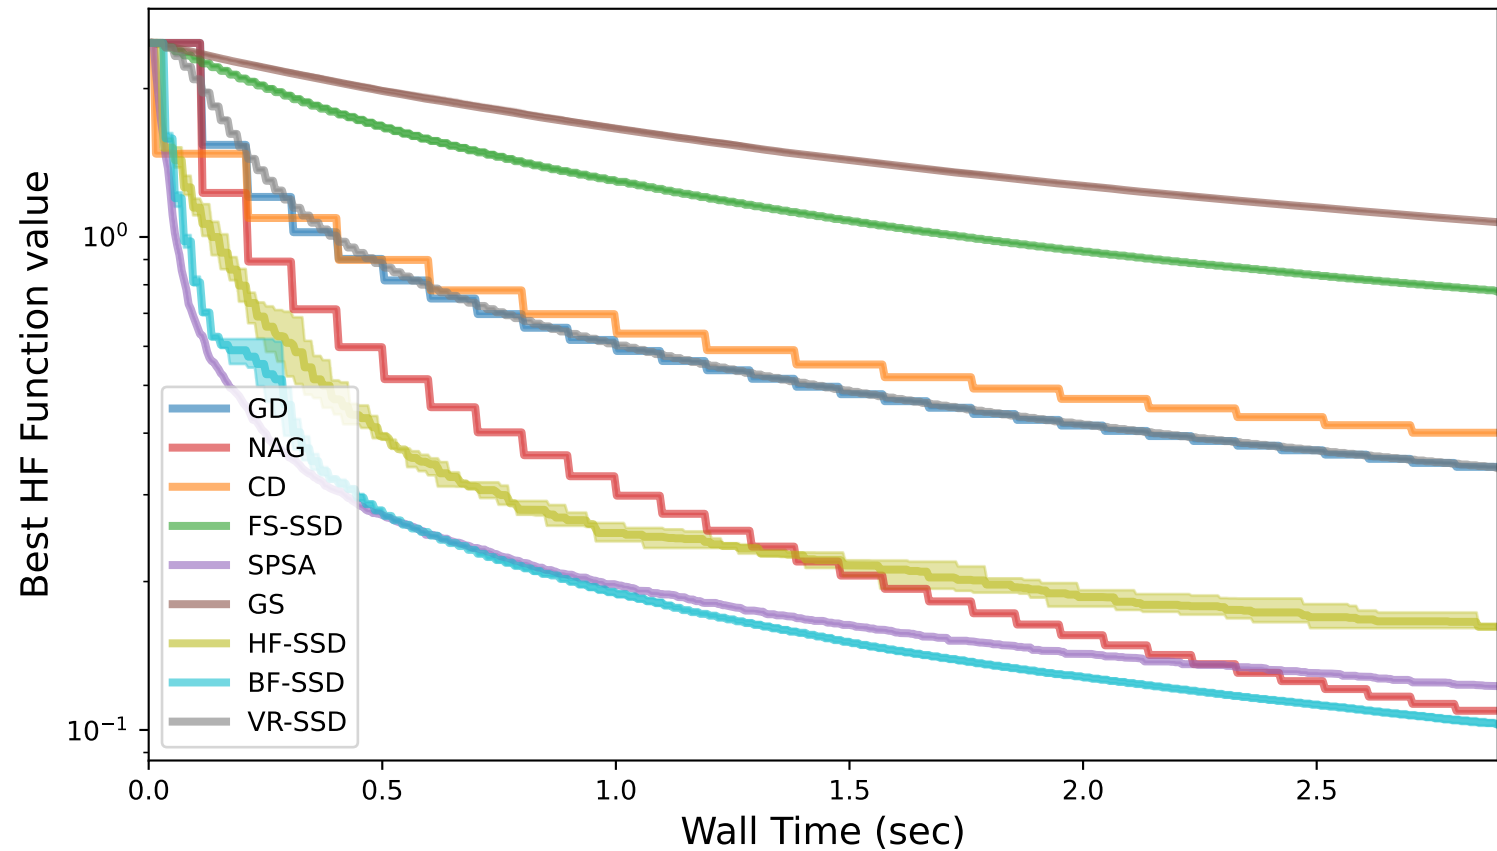

Supplement: supplementary_material [file worst-d1000-rH100-rL2-lmda20.0-ell200-c0.9-time.pdf › BF-Stochastic-Subspace-Descent-submission/figs/worst/worst-d1000-rH100-rL2-lmda20.0-ell200-c0.9-time.pdf]

# Worst Function in the World (ell=200)

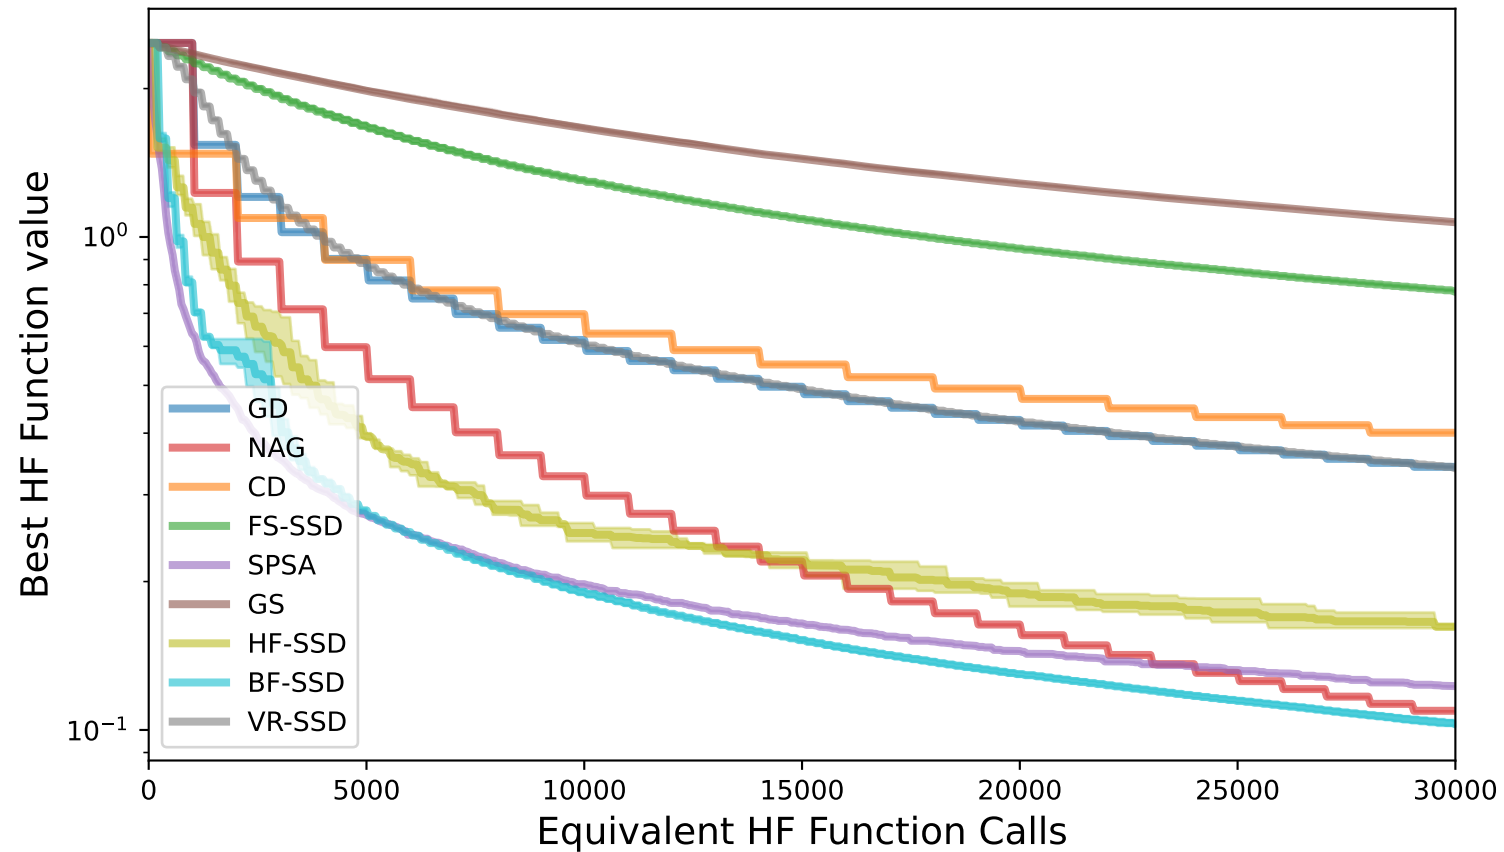

Supplement: supplementary_material [file worst-d1000-rH100-rL2-lmda20.0-ell200-c0.9.pdf › BF-Stochastic-Subspace-Descent-submission/figs/worst/worst-d1000-rH100-rL2-lmda20.0-ell200-c0.9.pdf]

# Worst Function in the World (Wall Time, ell=50)

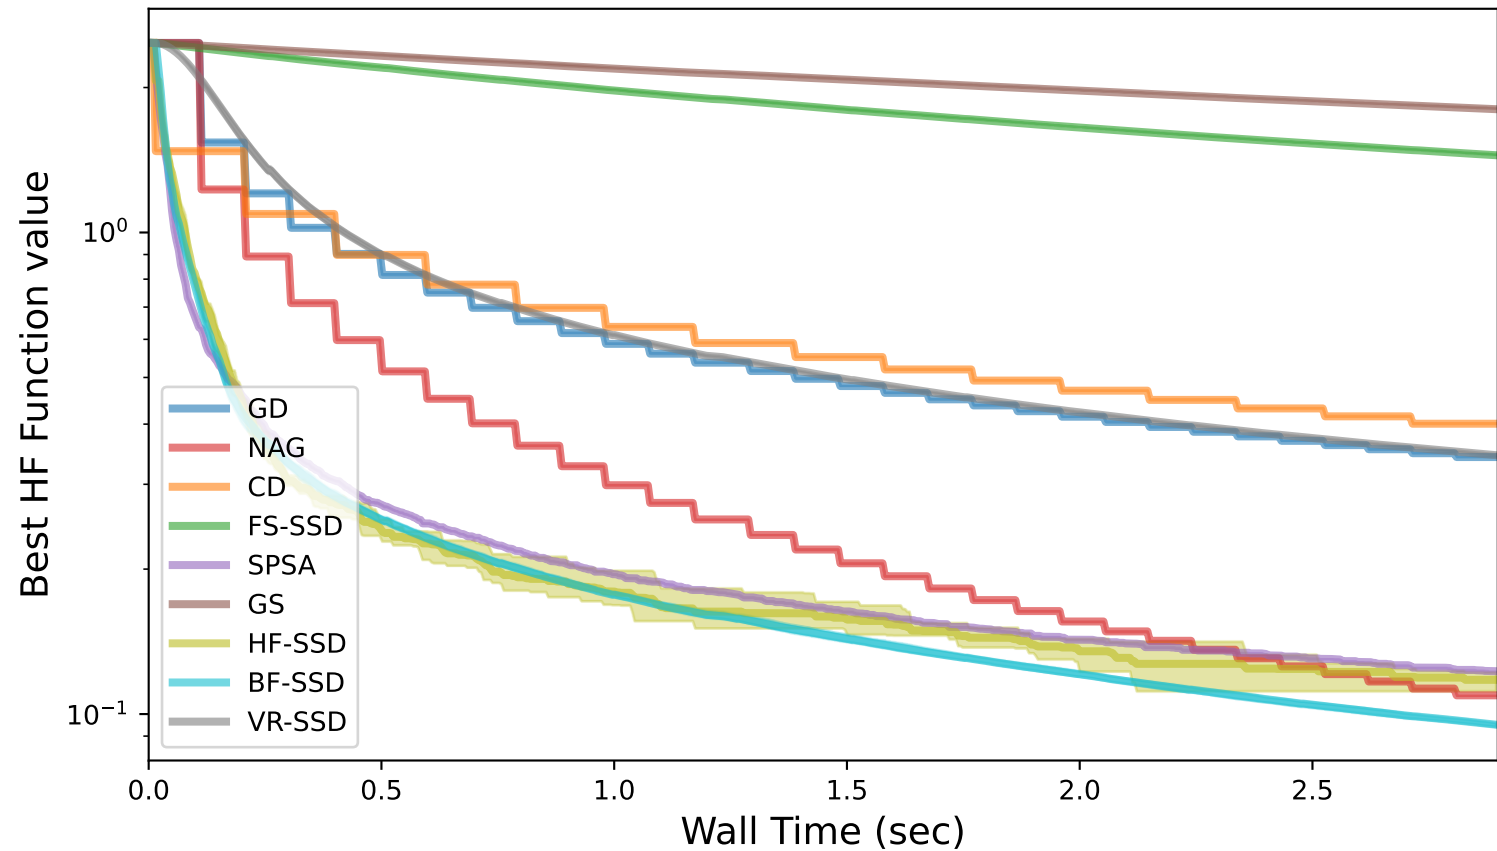

Supplement: supplementary_material [file worst-d1000-rH100-rL2-lmda20.0-ell50-c0.9-time.pdf › BF-Stochastic-Subspace-Descent-submission/figs/worst/worst-d1000-rH100-rL2-lmda20.0-ell50-c0.9-time.pdf]

# Worst Function in the World (ell=50)

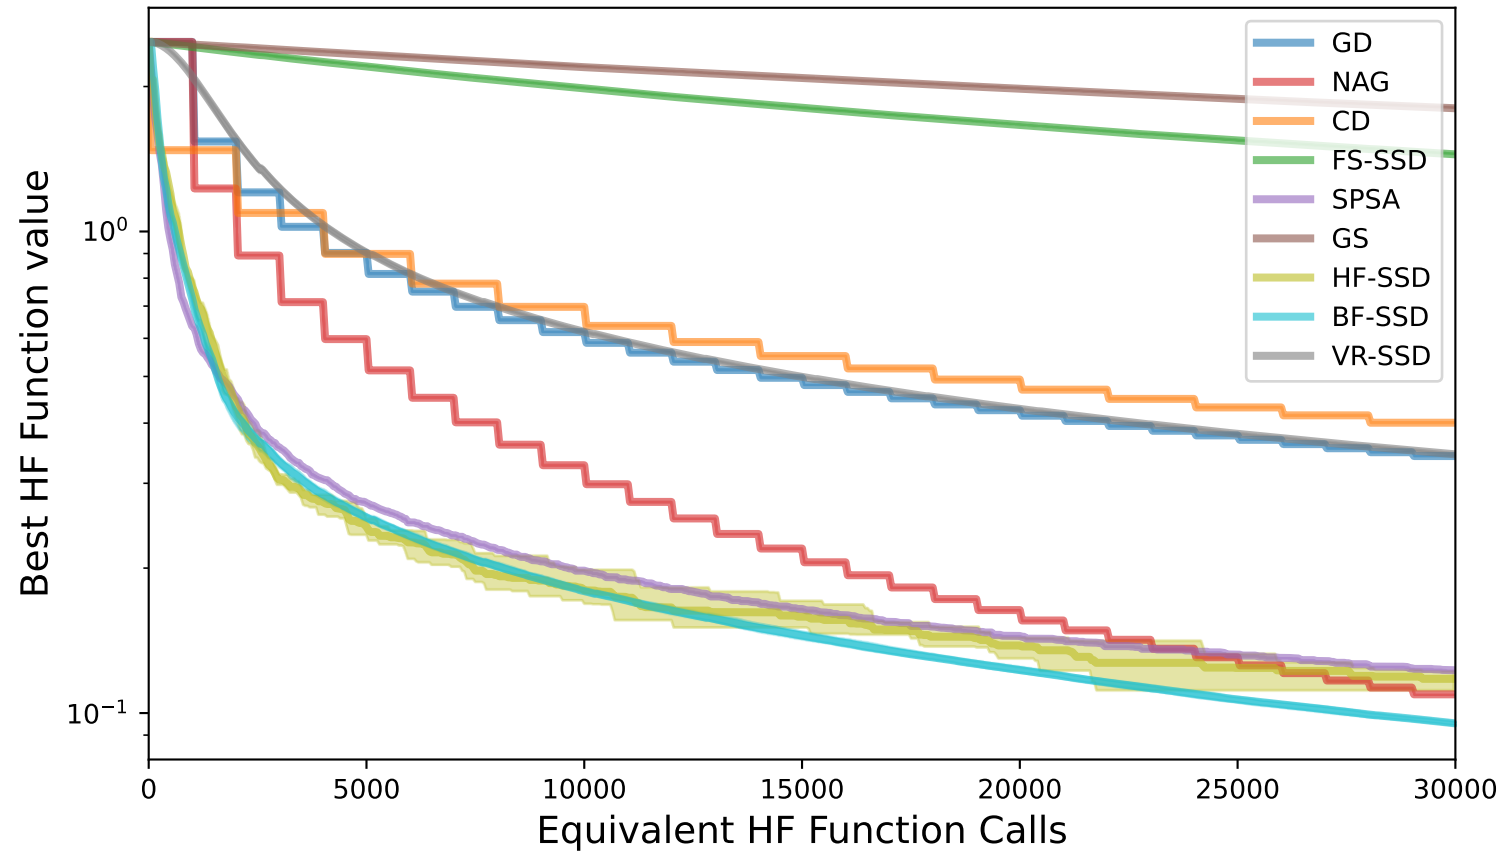

Supplement: supplementary_material [file worst-d1000-rH100-rL2-lmda20.0-ell50-c0.9.pdf › BF-Stochastic-Subspace-Descent-submission/figs/worst/worst-d1000-rH100-rL2-lmda20.0-ell50-c0.9.pdf]
